# Supplementary material
Source: PubMed Central journal article supplement (PMC3029941)

# Lung Vascular Function and Disease

FIG S1

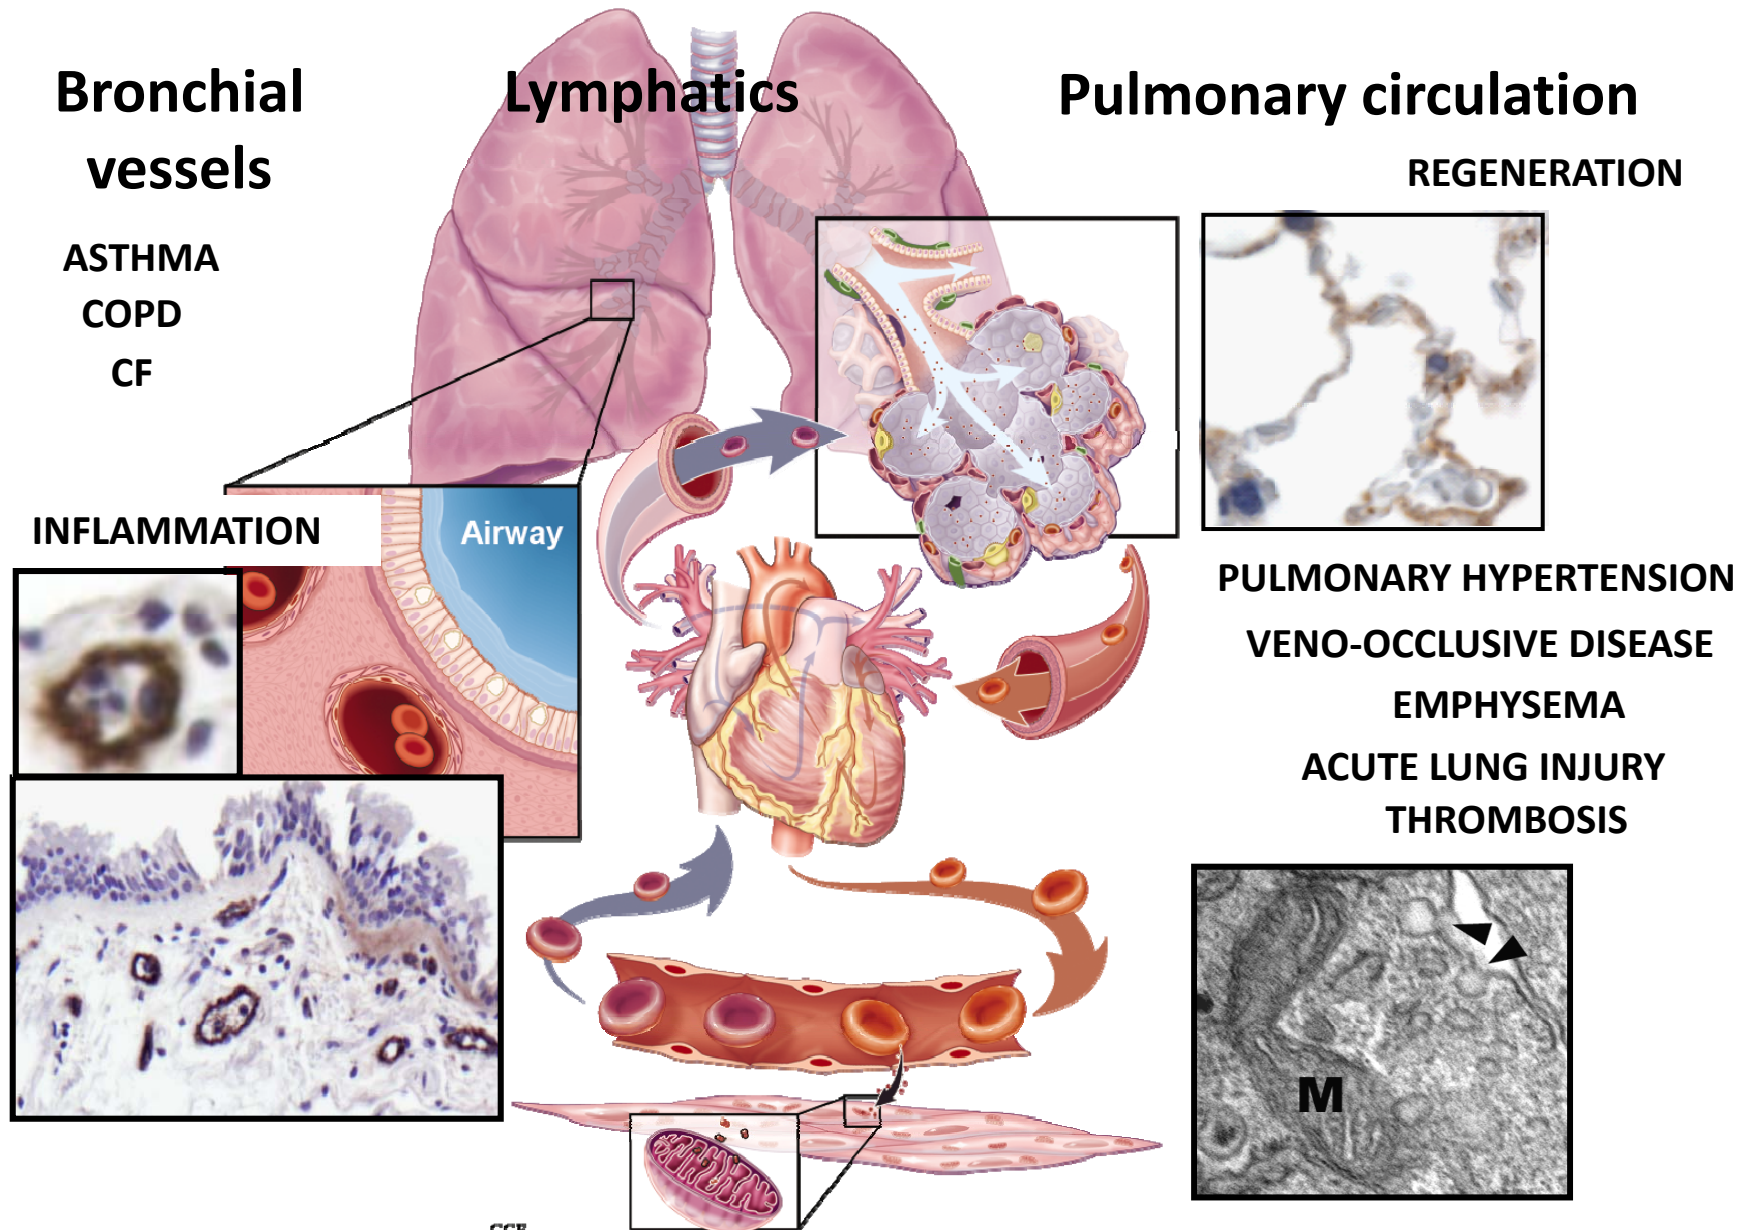

Systemic microvasculature

Lung vasculature

FIG S2

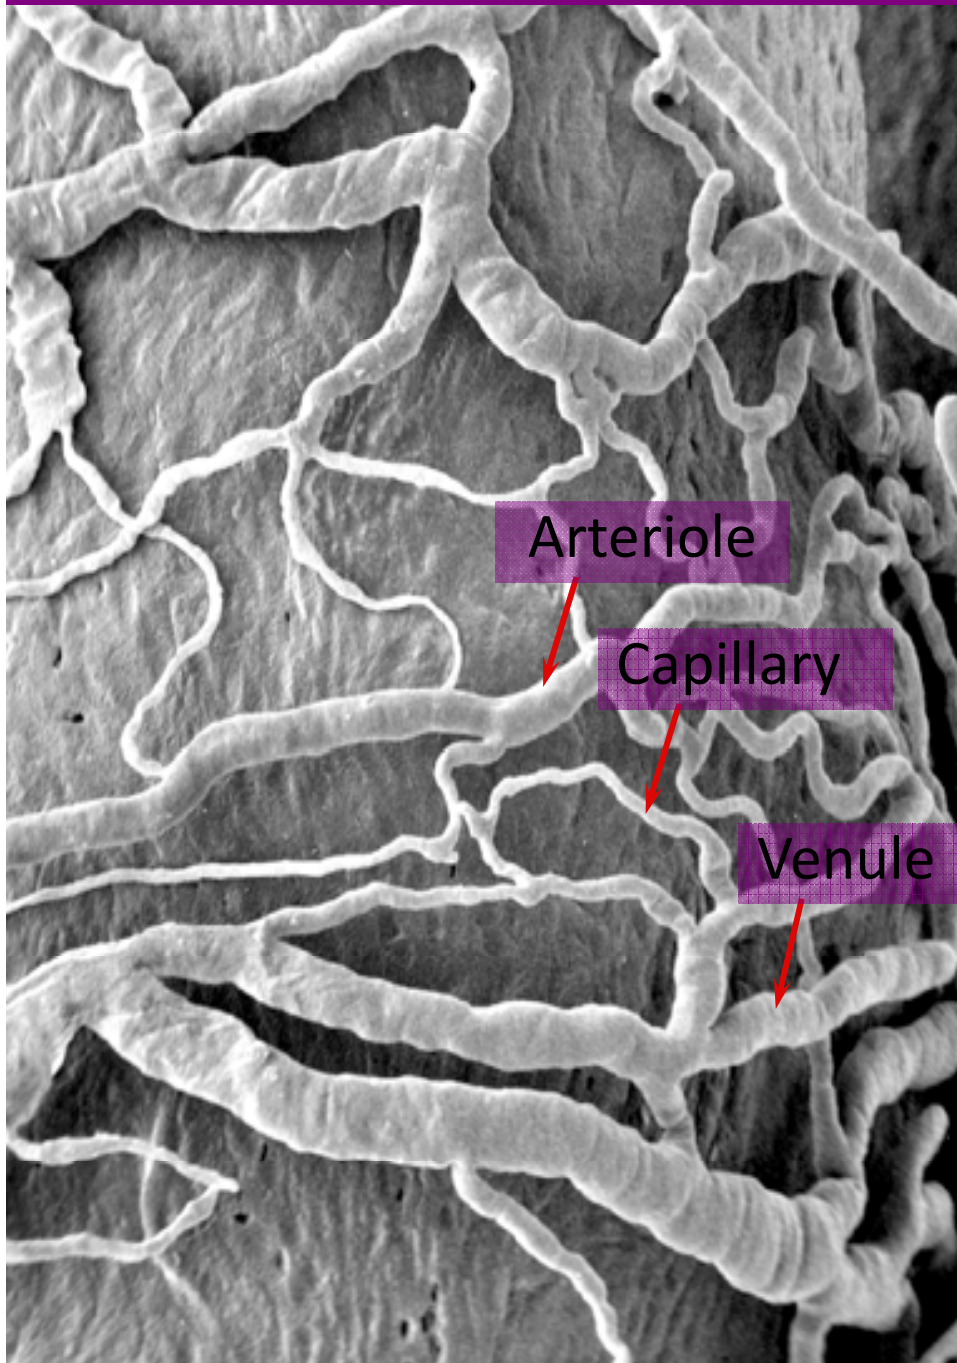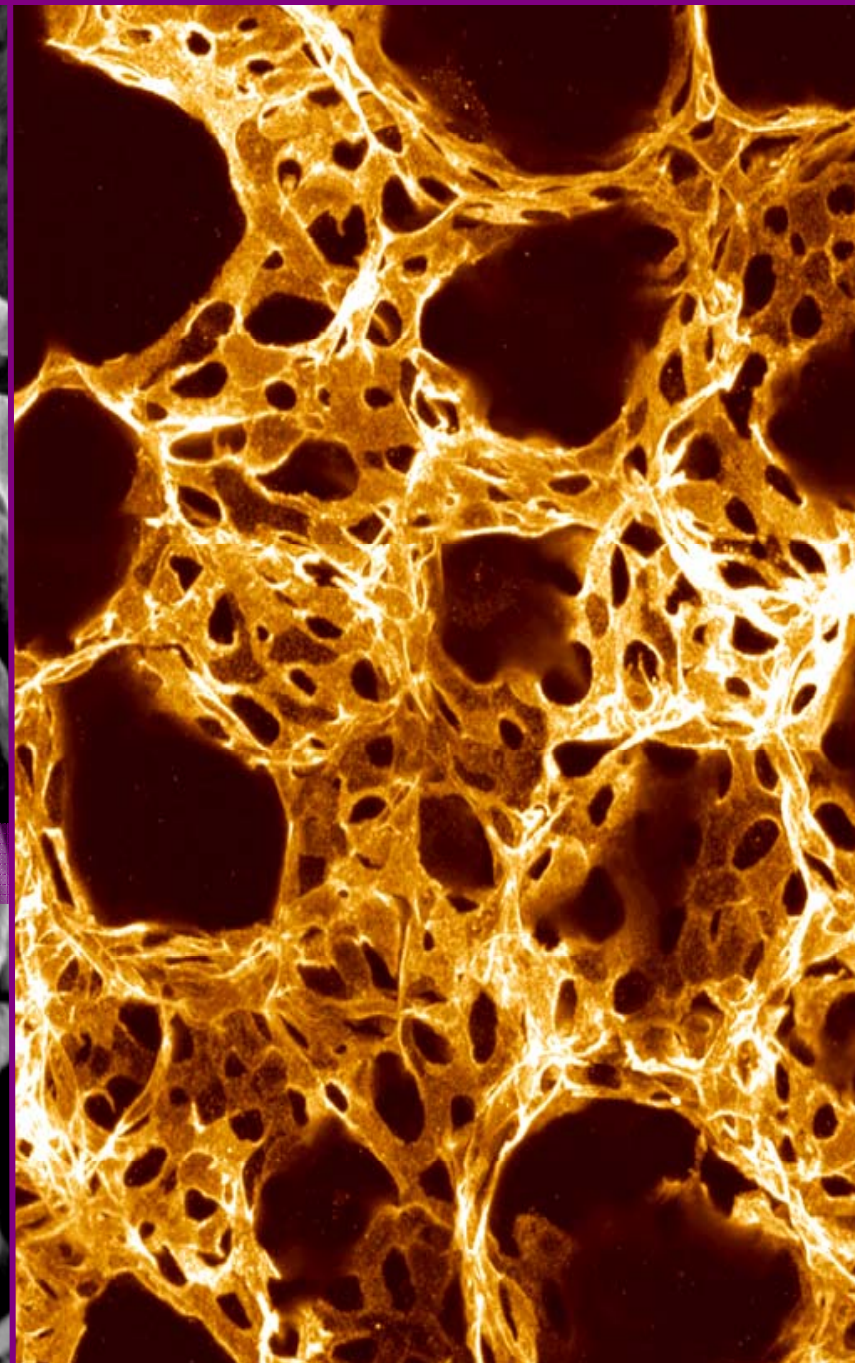

# Systems Biology and Pathobiology

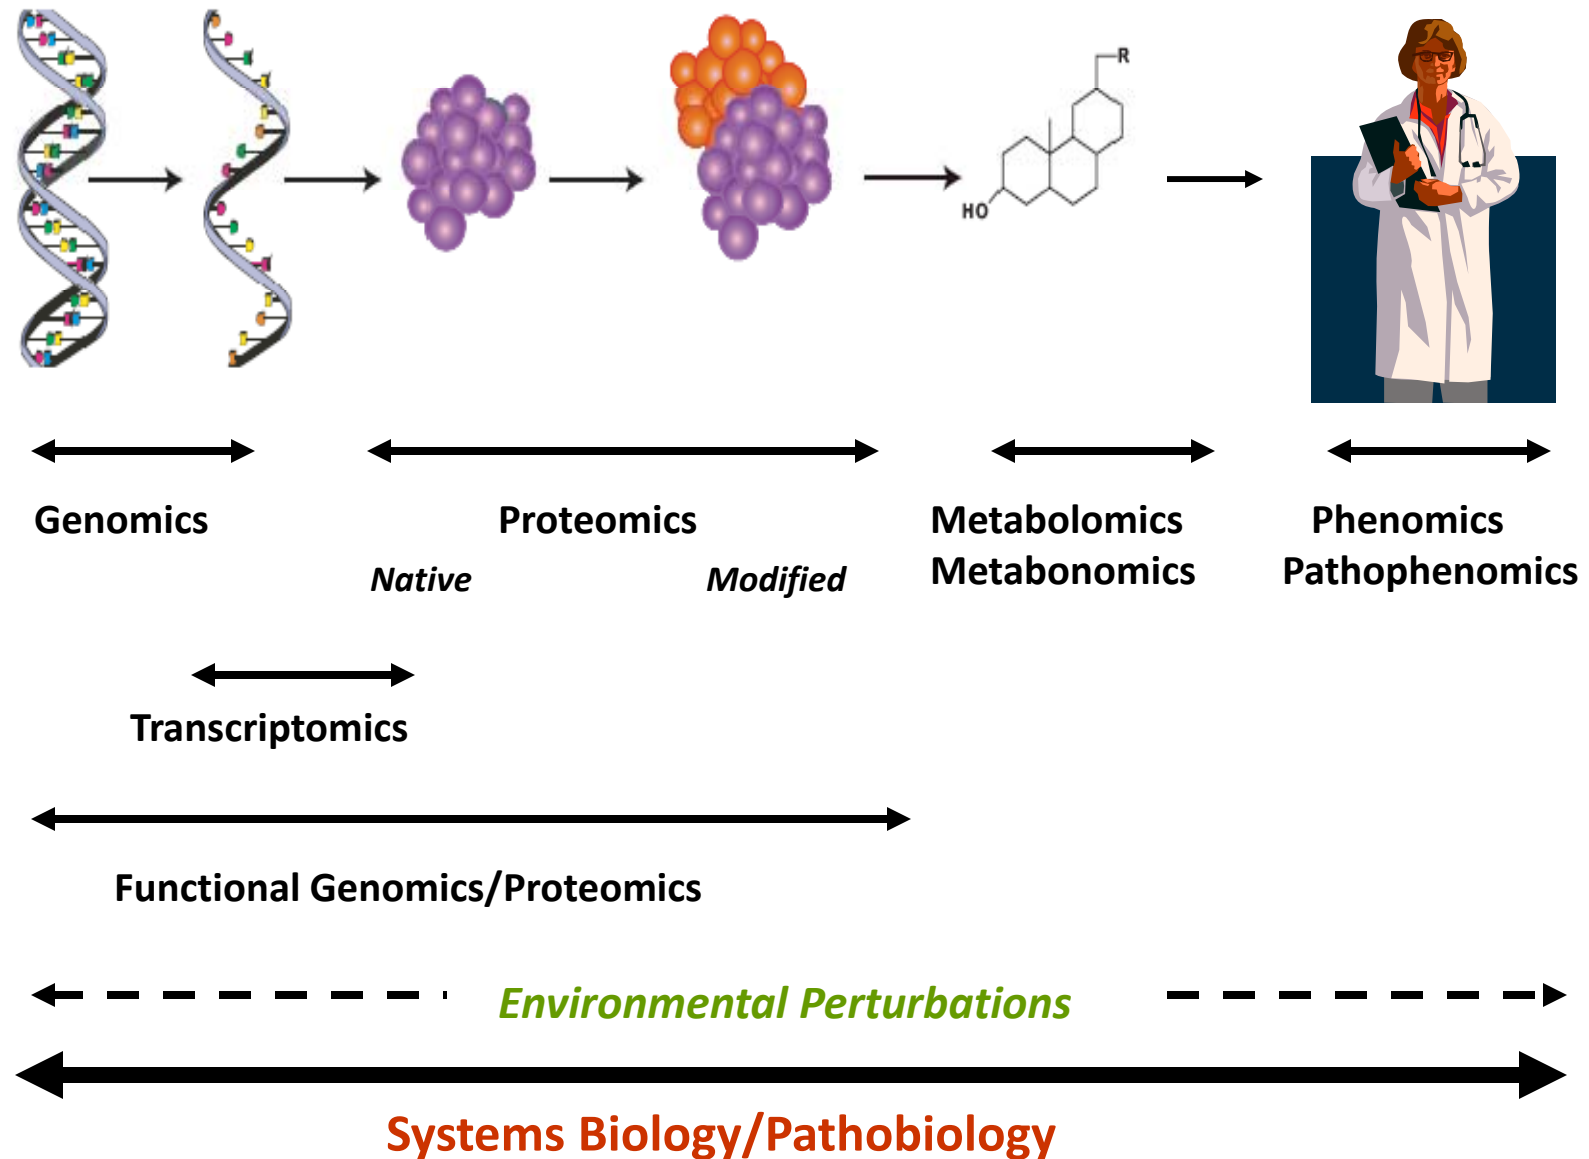

# Pulmonary Arterial Hypertension

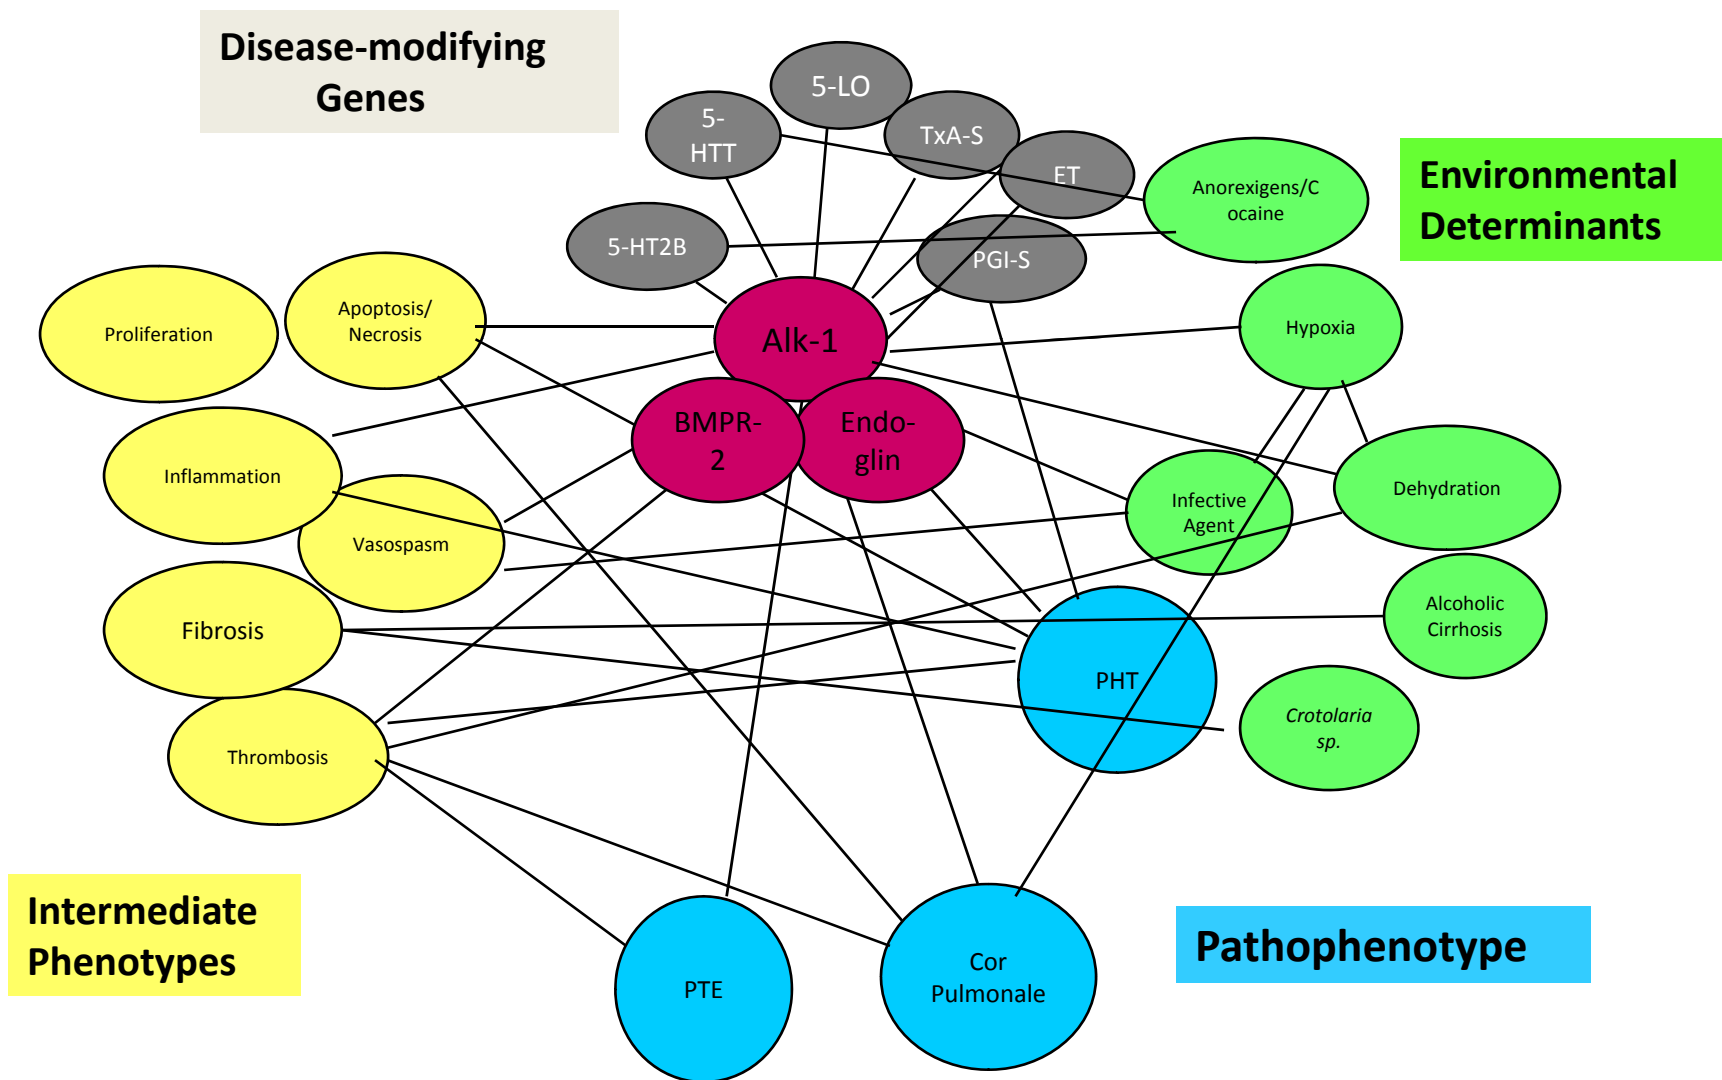

# Severe Pulmonary Hypertension

FIG S5

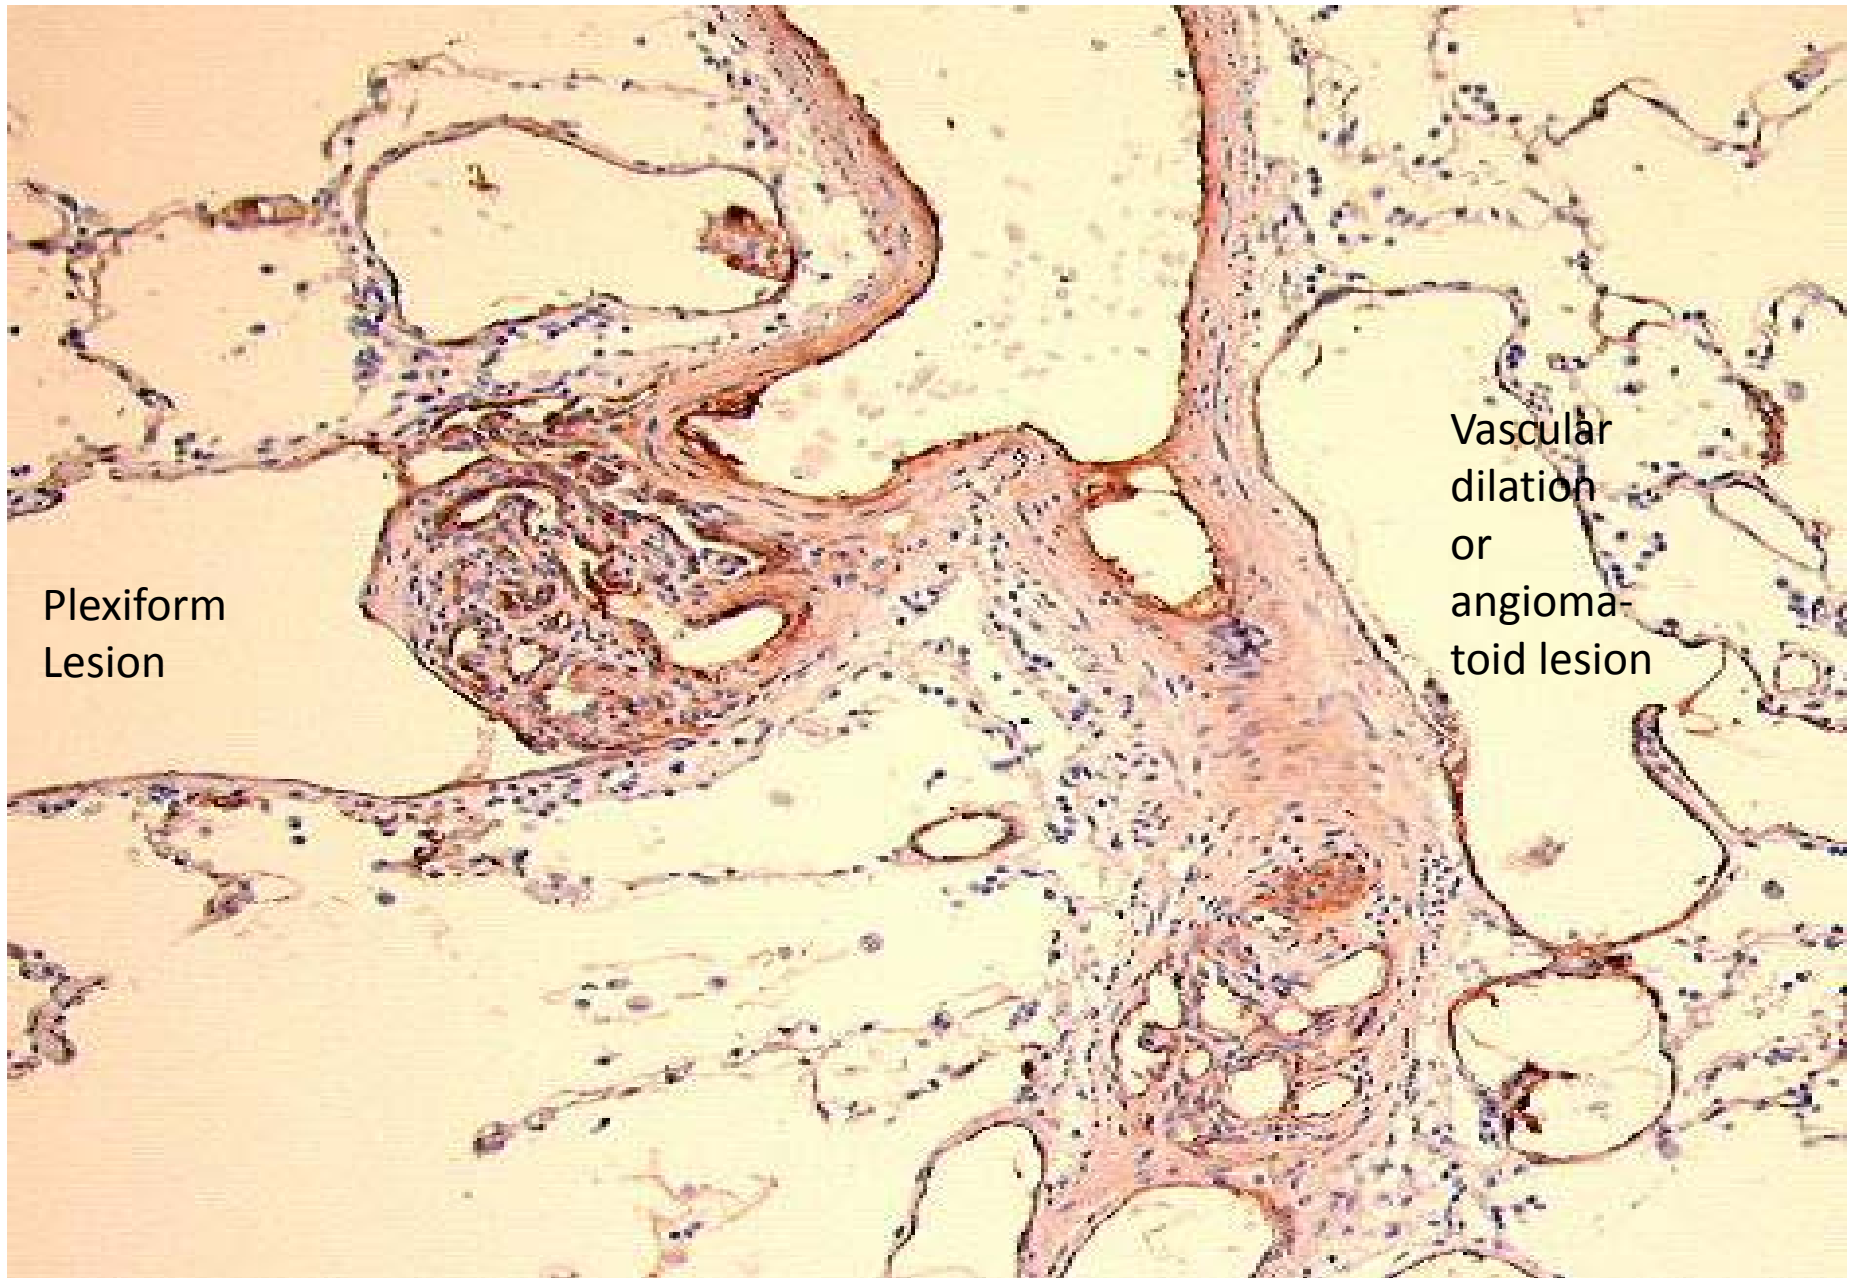

# Pharmacogenomic GWAS

FIG S6

## Challenges

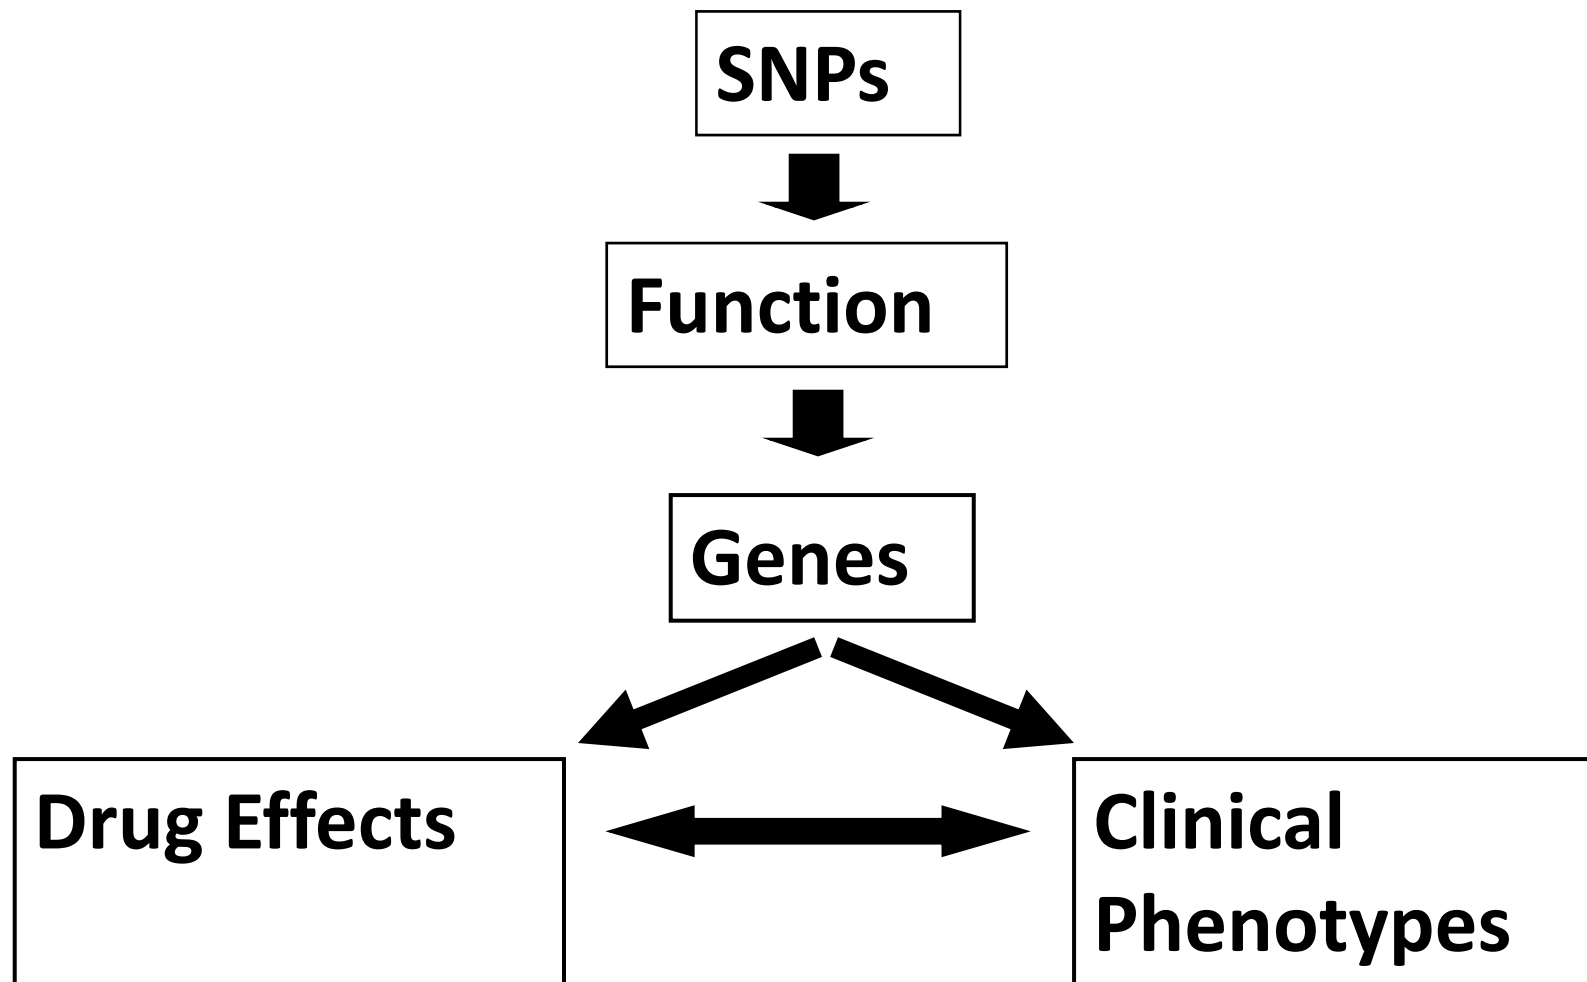

# Molecular diversity of tissues & vasculatures : molecular signature/zip code

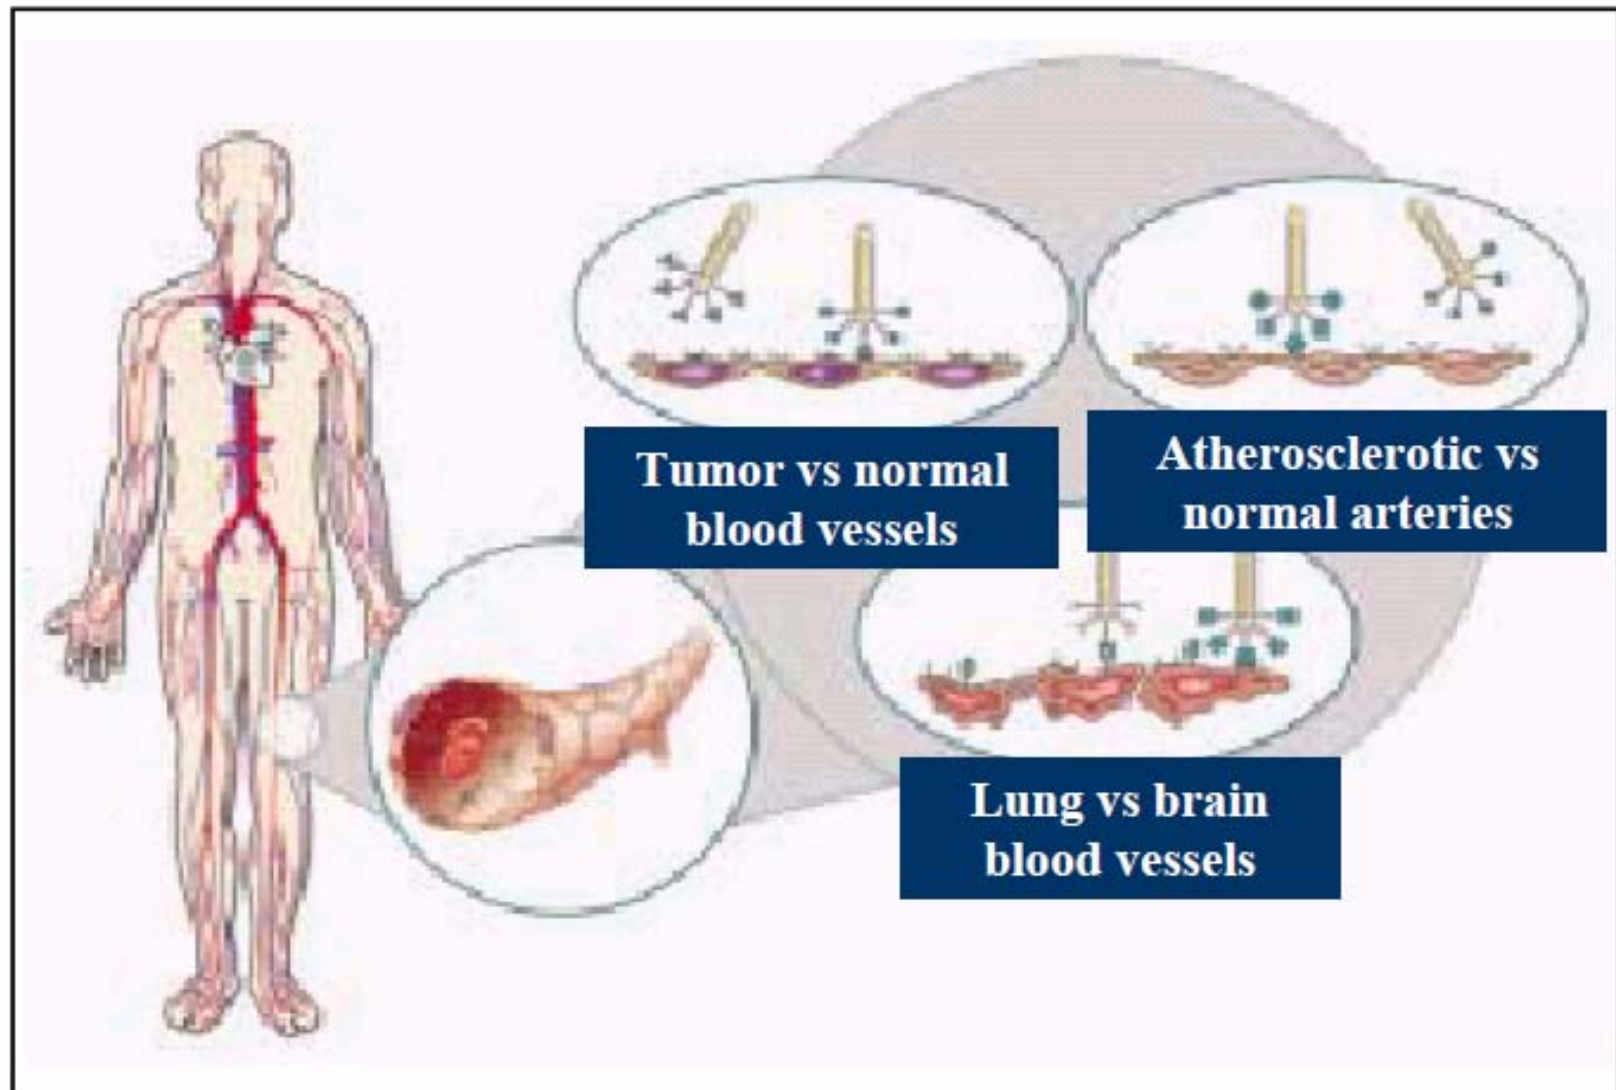

FIG S8

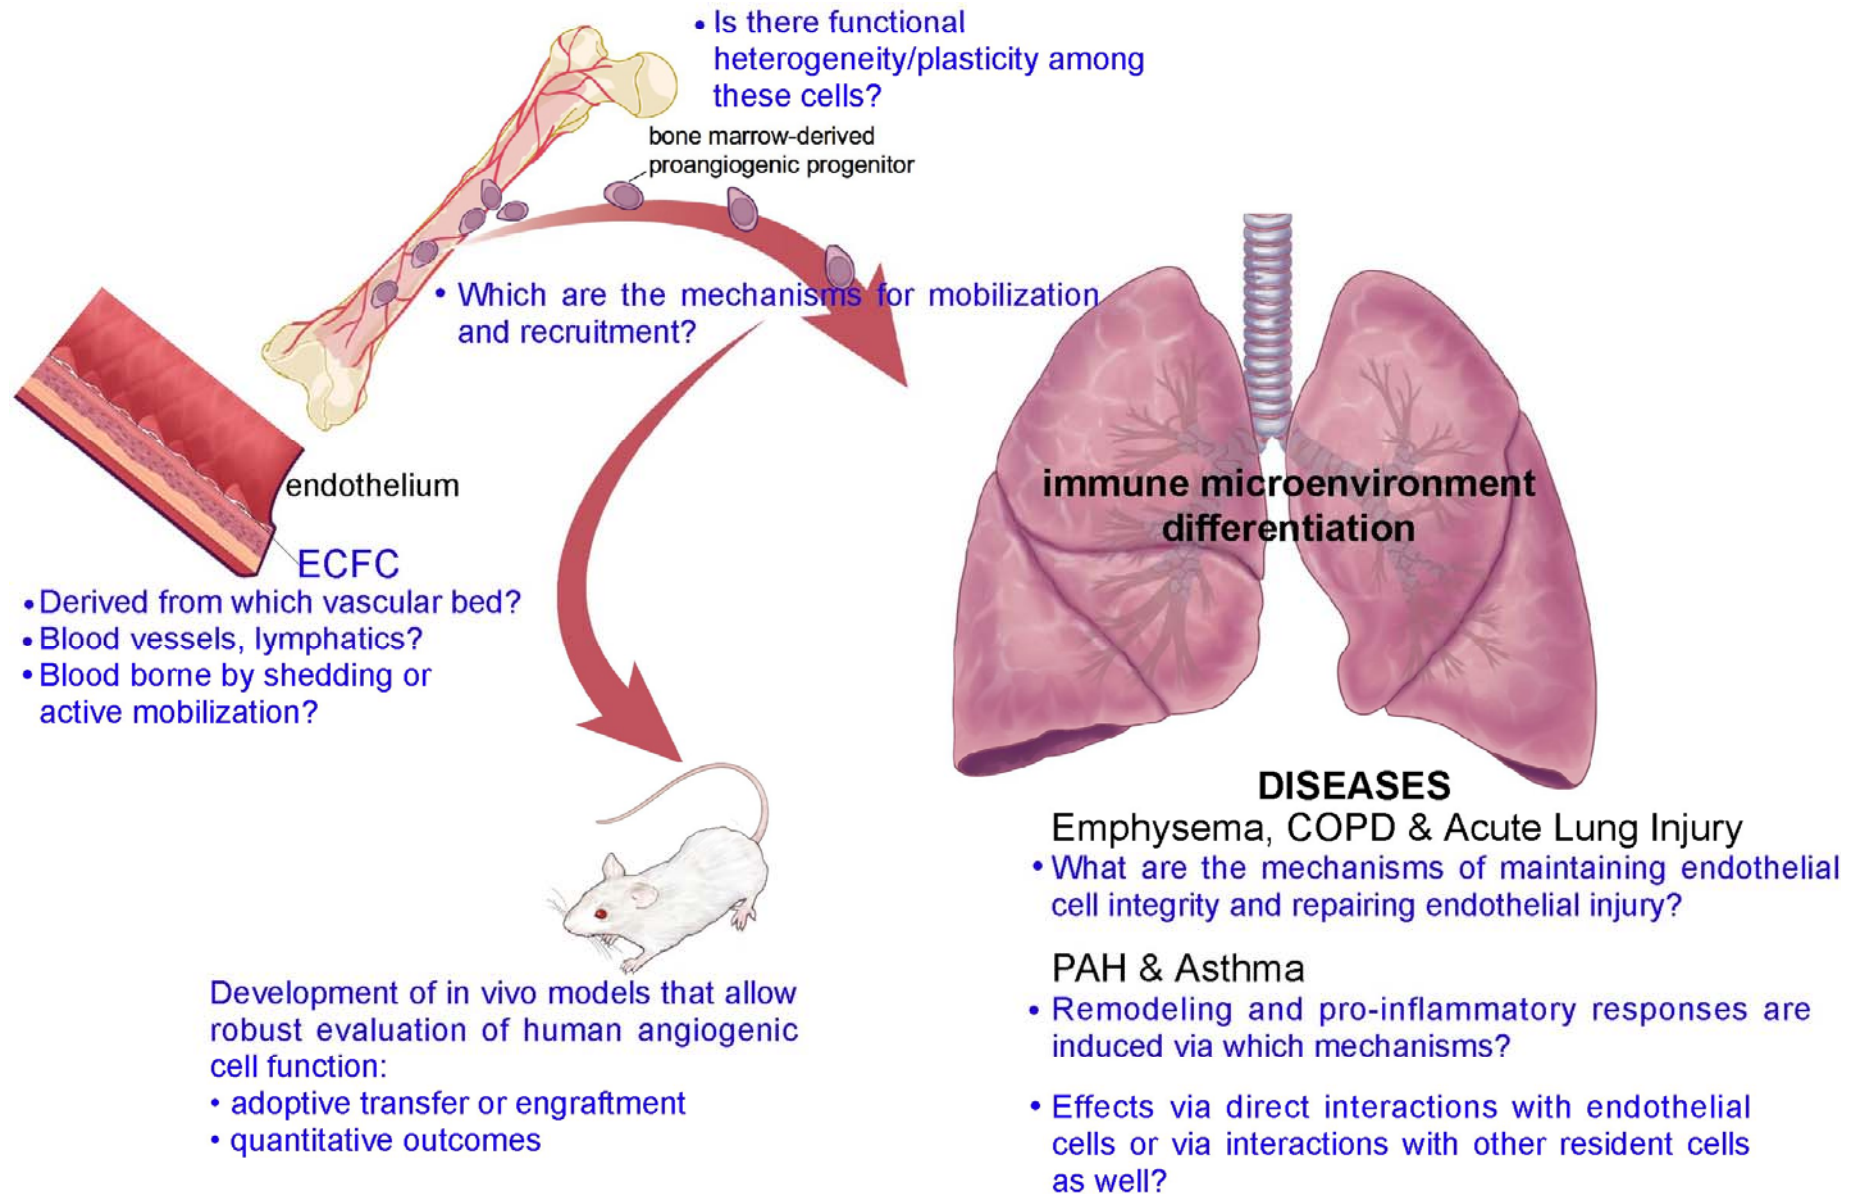



FIG S9

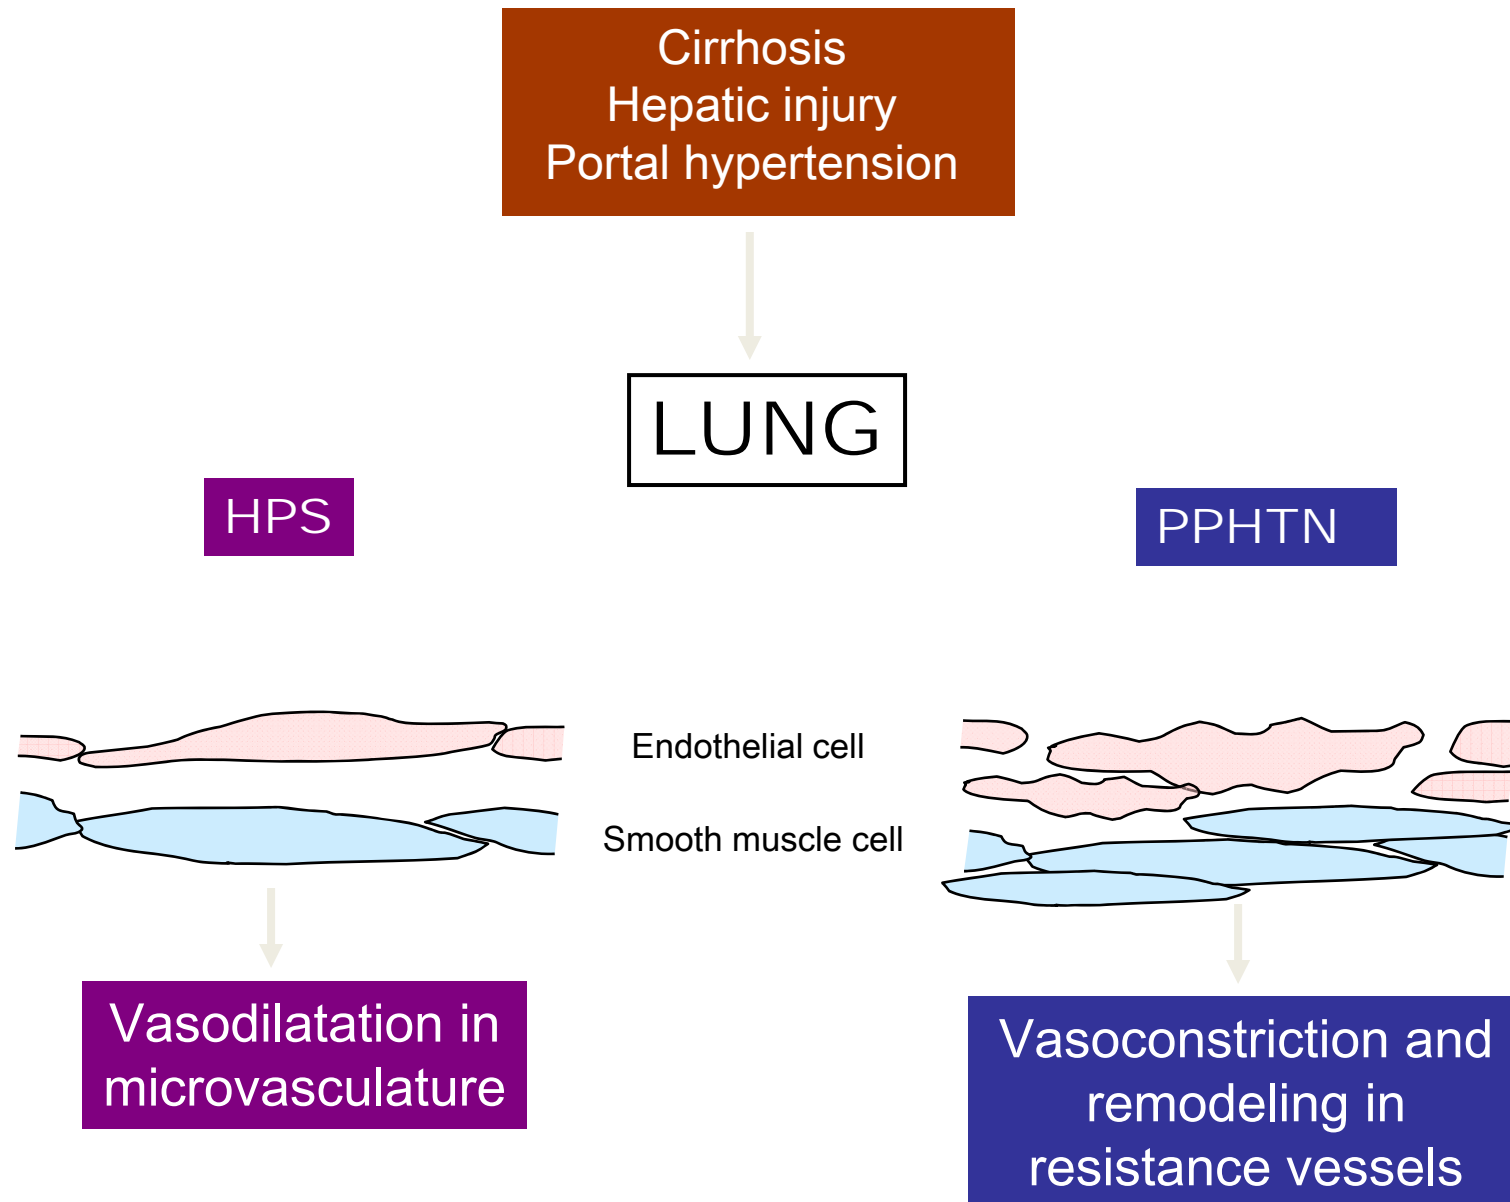

# Proximal Stiffening Leads to High Pulsatility Flow in Distal Vessels

FIG S10

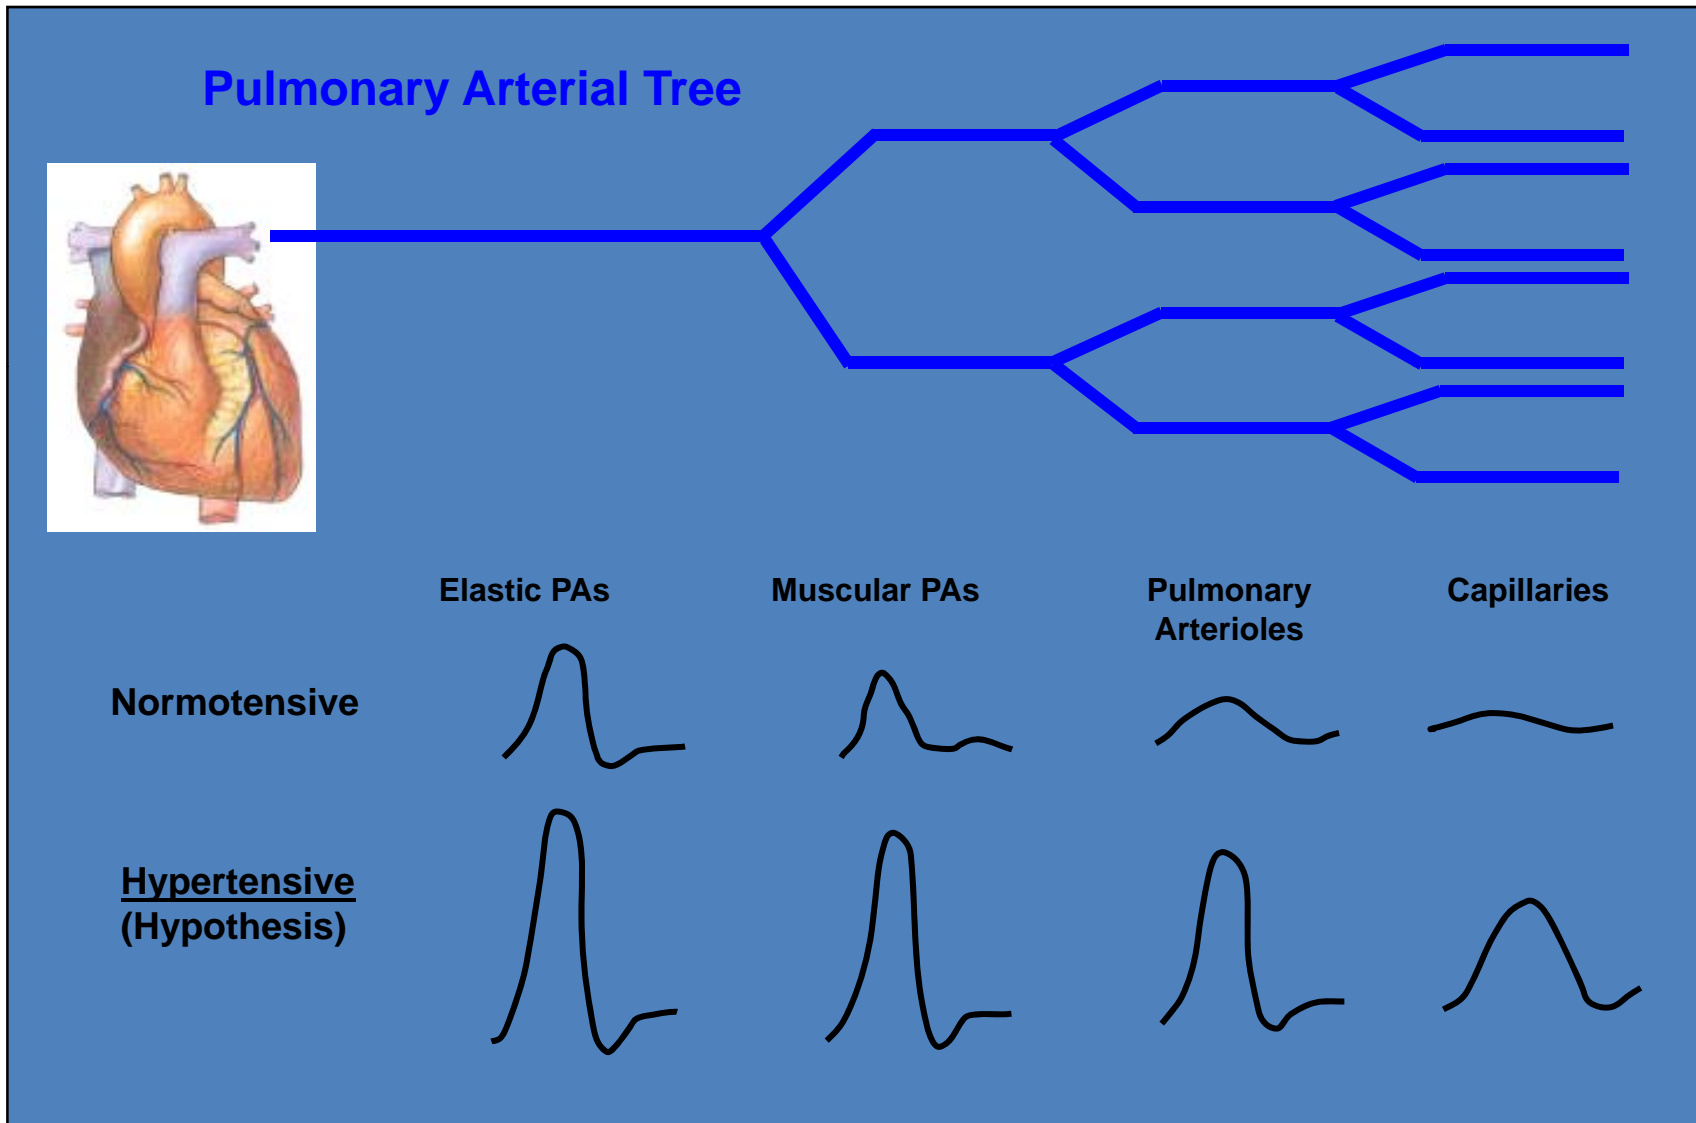

# Non-Pharmacological and Pharmacological Treatment Associated With Reduction in Arterial Stiffness

FIG S11

| <i>Non-Pharmacological</i>          | <i>Pharmacological</i>                       |
|-------------------------------------|----------------------------------------------|
| <b>Exercise training</b>            | <b>Anti-hypertensive treatment</b>           |
| <b>Dietary changes</b>              | <b>Diuretics</b>                             |
| <b>Weight Loss</b>                  | <b>Beta-blockers</b>                         |
| <b>Low -salt diet</b>               | <b>ACE-inhibitors</b>                        |
| <b>Moderate alcohol consumption</b> | <b>AT1 blockers</b>                          |
| <b>Garlic powder</b>                | <b>Calcium channel antagonists</b>           |
| <b>Alpha-Linolenic acid</b>         | <b>Treatment of congestive heart failure</b> |
| <b>Fish oil</b>                     | <b>ACE-inhibitors</b>                        |
| <b>HRT</b>                          | <b>Nitrates</b>                              |
|                                     | <b>Hypolipidemic agents</b>                  |
|                                     | <b>Statins</b>                               |
|                                     | <b>Antidiabetic agents</b>                   |
|                                     | <b>Thiazolidinediones</b>                    |
|                                     | <b>Ace-breakers</b>                          |
|                                     | <b>Alagebrium (ALT-711)</b>                  |
|                                     | <b>PDE5 inhibitors</b>                       |
|                                     | <b>Sildenafil</b>                            |

# Intentional Exercise and RV Mass

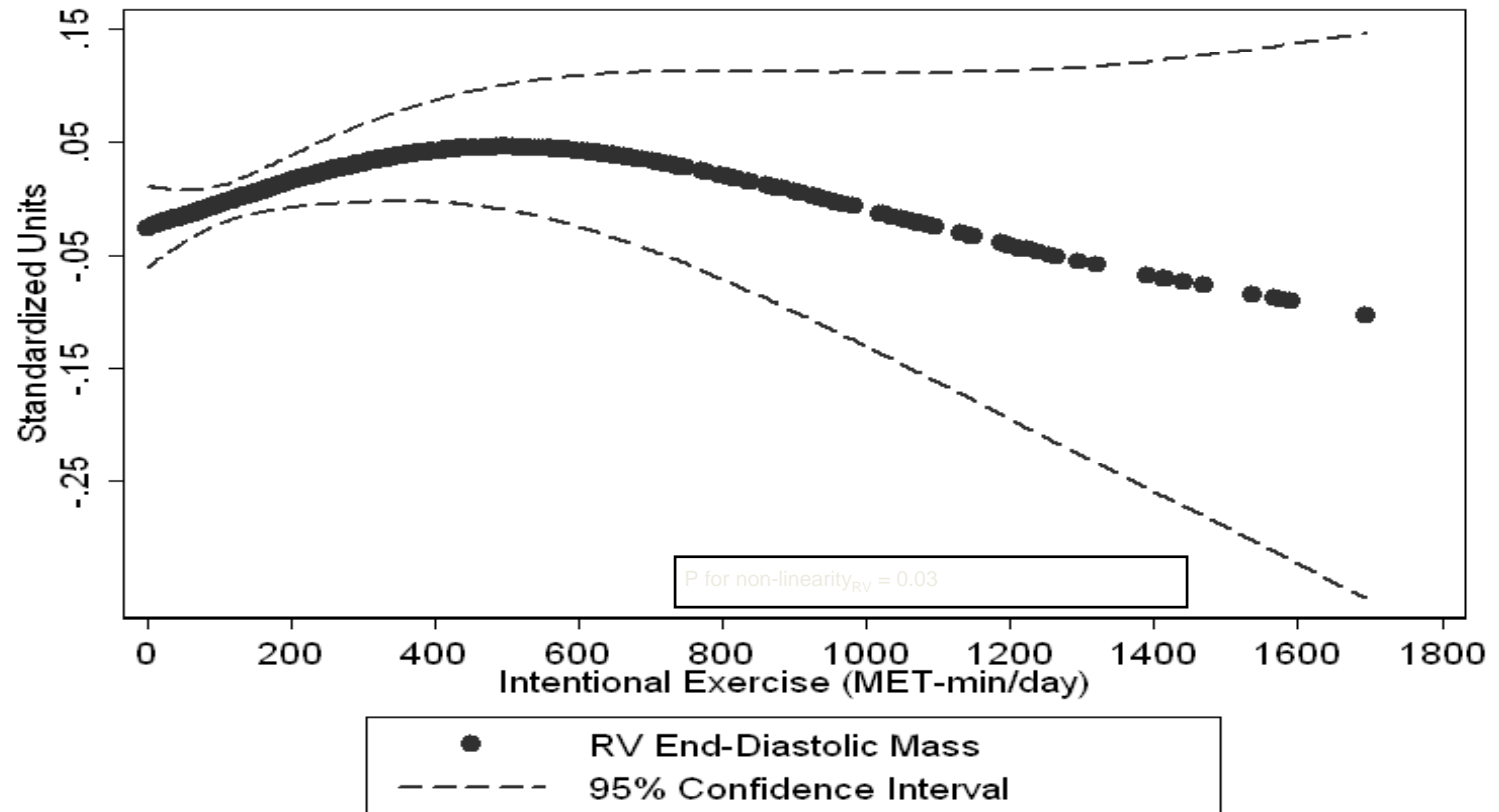

Adjusted for age, sex, race, education, height, weight, smoking, pkyrs, blood pressure, HTN, DM, chol, statin use, LV mass

# Right Ventricular Dysfunction / Failure is Largely the Result of Increased Afterload Which is Traditionally Considered in Terms of Pulmonary Vascular Resistance

FIG S13

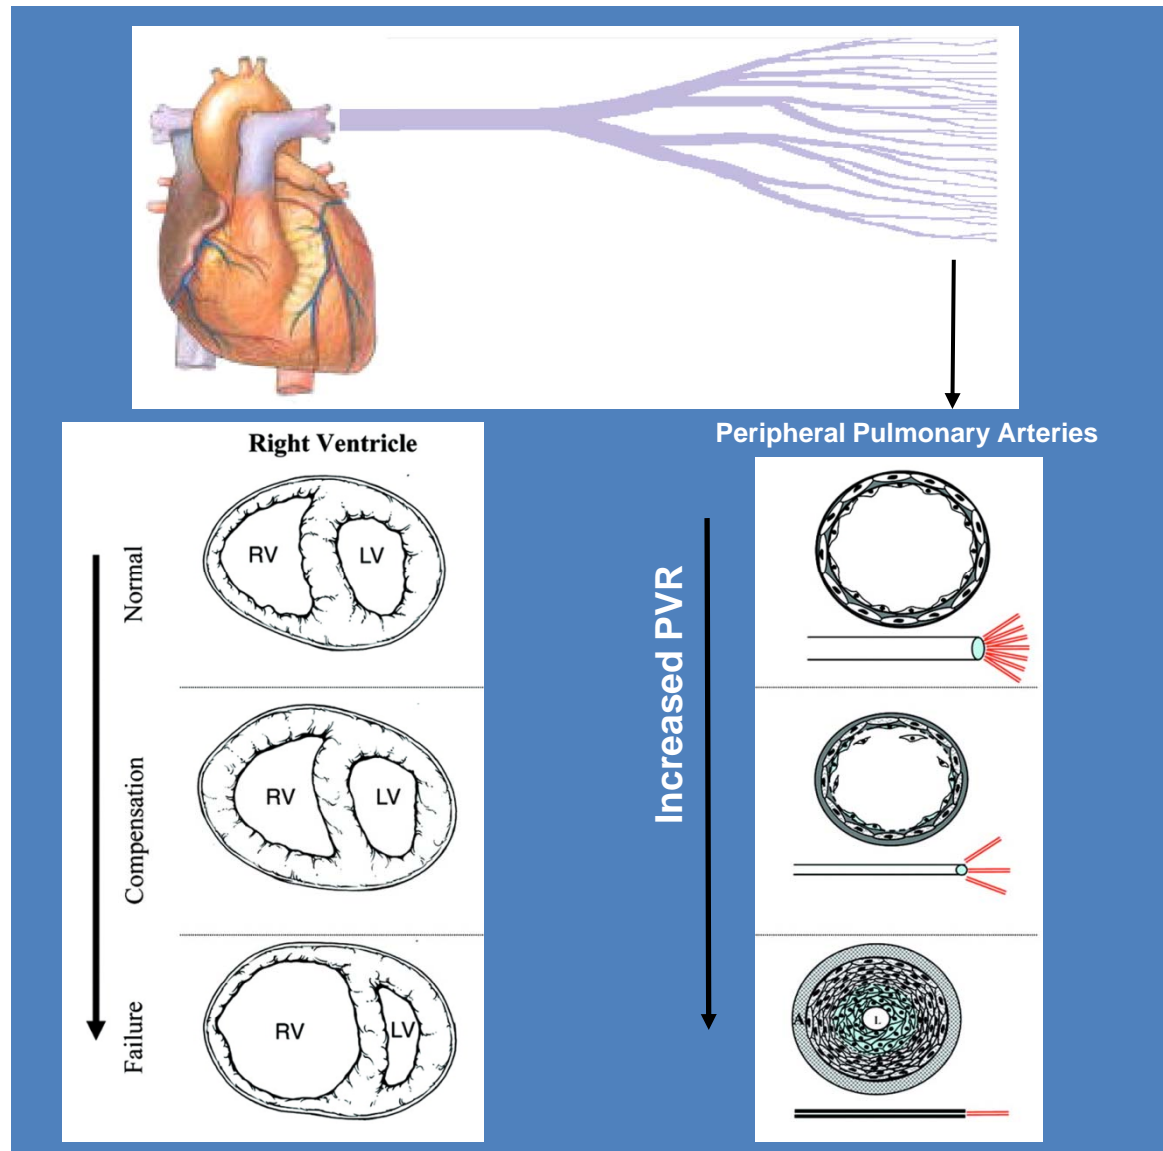

FIG S14

| RV                 |                     | LV              |
|--------------------|---------------------|-----------------|
| Fold ↑ ---         | afterload ---       | % ↑             |
| Adaptive ---       | hypertrophy ---     | maladaptive     |
| PAB damaging ---   | HDAC inhibition --- | TAC beneficial  |
| ANP zero ---       | expression ---      | ANP expressed   |
| No hypertrophy --- | norepinephrine ---  | hypertrophy     |
| ↓ contraction      | phenylephrine ---   | ↑ contraction   |
| ↓ miRNA 21 & 24    | failure ---         | ↑ miRNA 21 & 24 |

Some important differences which distinguish the RV

# RV Failure Due to Elevated Afterload is the Proximate Cause of Death in Patients With

## PAH

FIG S15

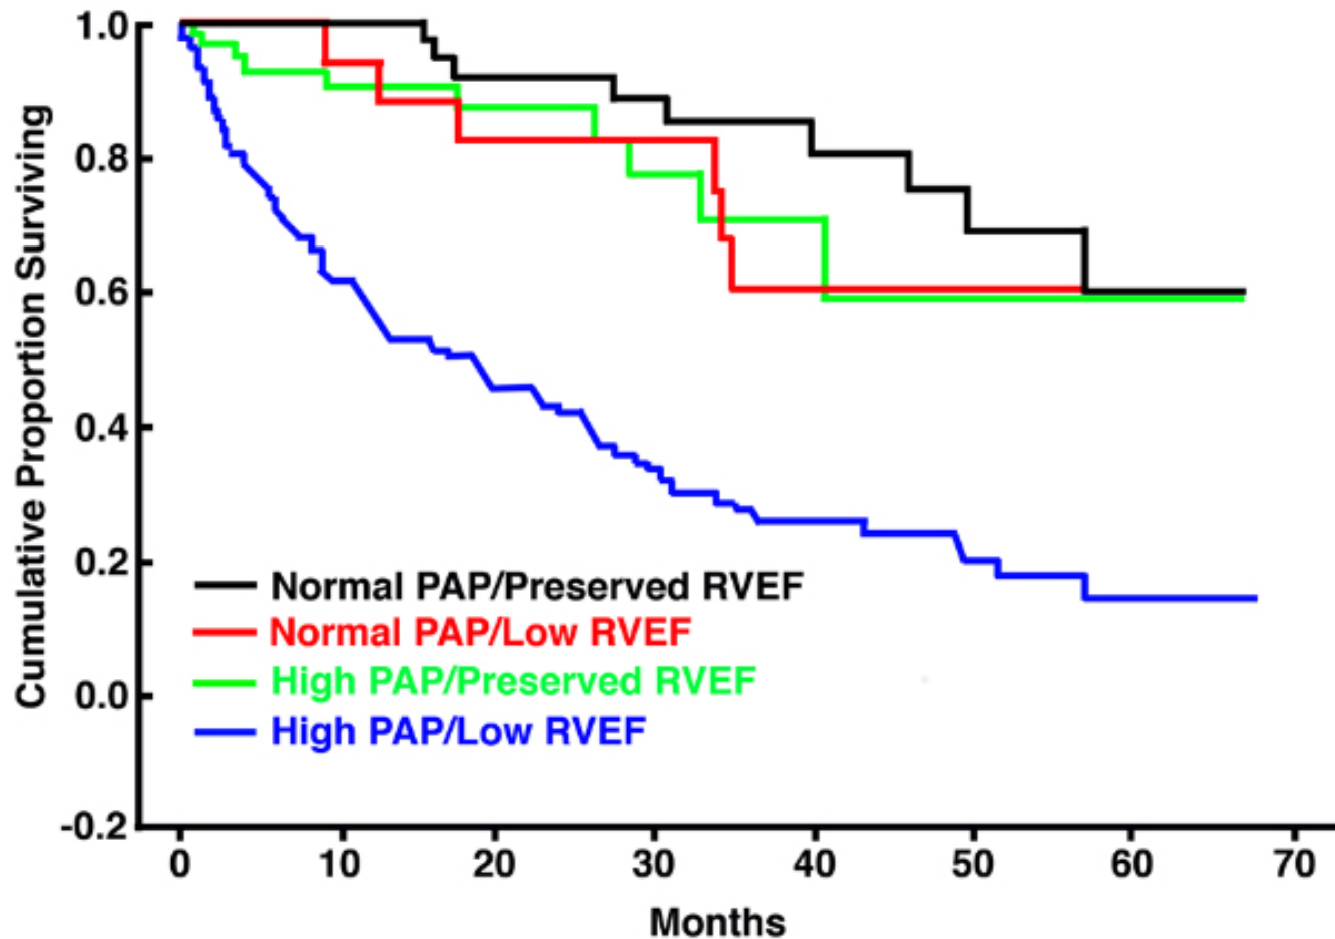

Supplement: supp_182_12_1554__2.pdf [file supp_182_12_1554__2.pdf]
